# Supplementary material for: Geological seabed stability model for informing Irish offshore renewable energy opportunities
Source: Copernicus journal article supplement (doi:10.5194/adgeo-54-55-2020), 2020-10-12
Supplement: Supplementary file 1 [file adgeo-54-55-2020-supplement.zip]

Archive with 2 entries (2 files):
- Peters_etal_AinG_2020_SI.xlsx
- adgeo-54-55-2020-supplement-title-page.pdf
