# Supplementary material for: Geological seabed stability model for informing Irish offshore renewable energy opportunities
Source: Copernicus journal article supplement (doi:10.5194/adgeo-54-55-2020), 2020-10-12
Supplement: Supplementary file 1 [file adgeo-54-55-2020-supplement.zip › adgeo-54-55-2020-supplement-title-page.pdf]

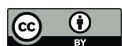

*Supplement of*

## **Geological seabed stability model for informing Irish offshore renewable energy opportunities**

**Jared L. Peters et al.**

*Correspondence to:* Jared L. Peters ([jared@fishery-liaisons.com](mailto:jared@fishery-liaisons.com))

- [adgeo-54-55-2020-supplement-title-page.pdf](#)
- [Peters\\_etal\\_AinG\\_2020\\_SI.xlsx](#)

The copyright of individual parts of the supplement might differ from the CC BY 4.0 License.
