# Supplementary material for: Geological seabed stability model for informing Irish offshore renewable energy opportunities
Source: Copernicus journal article supplement (doi:10.5194/adgeo-54-55-2020), 2020-10-12
Supplement: Supplementary file 1 [file Peters_etal_AinG_2020_SI.xlsx]

## Sheet: Sheet1
Sample name	Source	Description	Folk_7 coded estimate	Critical bed shear stress coded estimate	Angle of repose coded estimate	Point_X (IRENET95_Irish_Transverse_Mercator, Central meridian: -8)	Point_Y (IRENET95_Irish_Transverse_Mercator, Central meridian: -8)
CV19023_01G	This study.	Sediment grab.	6	5	3	450456	660094
CV19023_02G	This study.	Sediment grab.	7	5	5	440663	663789
CV19023_03aG	This study.	Sediment grab.	3	2	1	447069	650455
CV19023_04G	This study.	Sediment grab.	1	1	1	750843	764440
CV19023_05G	This study.	Sediment grab.	1	1	1	751165	770824
CV19023_06G	This study.	Sediment grab.	1	1	1	750873	775396
CV19023_07G	This study.	Sediment grab.	1	1	1	765627	776943
CV19023_08G	This study.	Sediment grab.	1	1	1	770693	777059
CV19023_09G	This study.	Sediment grab.	1	1	1	770761	779513
CV19023_10G	This study.	Sediment grab.	1	1	1	757478	778518
CV19023_11G	This study.	Sediment grab.	1	1	1	749357	786798
CV19023_12G	This study.	Sediment grab.	1	1	1	748420	782186
CV19023_13G	This study.	Sediment grab.	1	1	1	745884	776674
CV19023_14G	This study.	Sediment grab.	1	1	1	742239	776363
CV19023_15G	This study.	Sediment grab.	1	1	1	742751	775054
CV19026_03G	This study.	Sediment grab.	3	2	1	602482	536412
CV19026_03aG	This study.	Sediment grab.	3	2	1	602303	536298
CE14004_48VC	Peters_etal(2016)	Sediment sample from literature.	4	3	1	399122	700059
CE14004_43VC	Peters_etal(2016)	Sediment sample from literature.	3	2	1	390285	639535
CE14004_42VC	Peters_etal(2016)	Sediment sample from literature.	3	2	1	396649	639186
CE14004_41VC	Peters_etal(2016)	Sediment sample from literature.	4	3	1	407045	700261
CE14004_38VC	Peters_etal(2016)	Sediment sample from literature.	7	5	5	355361	706188
CE14004_60VC	Peters_etal(2016)	Sediment sample from literature.	4	3	1	430769	799446
CE14004_59VC	Peters_etal(2016)	Sediment sample from literature.	4	3	1	426432	763971
CE14004_56VC	Peters_etal(2016)	Sediment sample from literature.	5	4	3	409525	772882
CE14004_55VC	Peters_etal(2016)	Sediment sample from literature.	3	2	1	398136	772514
CE14004_54VC	Peters_etal(2016)	Sediment sample from literature.	3	2	1	387852	769878
CE14004_53VC	Peters_etal(2016)	Sediment sample from literature.	4	3	1	399304	743214
CE14004_62VC	Peters_etal(2016)	Sediment sample from literature.	4	3	1	423849	819027
CE14004_52VC	Peters_etal(2016)	Sediment sample from literature.	5	4	3	400449	749584
CE14004_48VC	Peters_etal(2016)	Sediment sample from literature.	4	3	1	399122	700059
CE14004_43VC	Peters_etal(2016)	Sediment sample from literature.	4	3	1	390285	639535
CE14004_42VC	Peters_etal(2016)	Sediment sample from literature.	4	3	1	396649	639186
CE14004_41VC	Peters_etal(2016)	Sediment sample from literature.	4	3	1	407045	700261
CE14004_60VC	Peters_etal(2016)	Sediment sample from literature.	4	3	1	430769	799446
CE14004_59VC	Peters_etal(2016)	Sediment sample from literature.	4	3	1	426432	763971
CE10008_35VC	Peters_etal(2016)	Sediment sample from literature.	4	3	1	383878	819981
CE10008_36VC	Peters_etal(2016)	Sediment sample from literature.	4	3	1	388125	807509
CE10008_38VC	Peters_etal(2015)	Sediment sample from literature.	5	4	3	422074	794222
CE10008_40VC	Peters_etal(2015)	Sediment sample from literature.	4	3	1	423152	777869
115VC	CallardETAL(18)	Sediment sample from literature.	4	3	1	513860	993496
136VC	CallardETAL(18)	Sediment sample from literature.	4	3	1	546746	1.04903e+06
179VC	CallardETAL(20)	Sediment sample from literature.	4	3	1	456662	725348
183VC	CallardETAL(20)	Sediment sample from literature.	4	3	1	449937	732515
186VC	CallardETAL(20)	Sediment sample from literature.	4	3	1	446189	708877
187VC	CallardETAL(20)	Sediment sample from literature.	4	3	1	421337	720025
188VC	CallardETAL(20)	Sediment sample from literature.	4	3	1	403631	729329
189VC	CallardETAL(20)	Sediment sample from literature.	4	3	1	397547	733888
192VC	CallardETAL(20)	Sediment sample from literature.	6	5	3	386341	742325
195VC	CallardETAL(20)	Sediment sample from literature.	4	3	1	353731	764294
211VC	CallardETAL(20)	Sediment sample from literature.	4	3	1	349988	703748
15VC	LockhartETAL(18)	Sediment sample from literature.	4	3	1	454923	250459
16VC	LockhartETAL(18)	Sediment sample from literature.	4	3	1	453425	251325
18VC	LockhartETAL(18)	Sediment sample from literature.	1	1	1	528091	310009
19VC	LockhartETAL(18)	Sediment sample from literature.	4	3	1	528234	309866
20VC	LockhartETAL(18)	Sediment sample from literature.	4	3	1	528663	309113
21VC	LockhartETAL(18)	Sediment sample from literature.	4	3	1	530056	307978
22VC	LockhartETAL(18)	Sediment sample from literature.	4	3	1	556327	338014
28VC	LockhartETAL(18)	Sediment sample from literature.	4	3	1	577642	356642
29VC	LockhartETAL(18)	Sediment sample from literature.	4	3	1	577279	356618
30VC	LockhartETAL(18)	Sediment sample from literature.	4	3	1	575700	356517
31VC	LockhartETAL(18)	Sediment sample from literature.	4	3	1	575690	356529
32VC	LockhartETAL(18)	Sediment sample from literature.	4	3	1	575533	356499
33VC	LockhartETAL(18)	Sediment sample from literature.	1	1	1	575395	391214
34VC	LockhartETAL(18)	Sediment sample from literature.	5	4	3	574976	381409
35VC	LockhartETAL(18)	Sediment sample from literature.	3	2	1	575394	390868
44VC	LockhartETAL(18)	Sediment sample from literature.	1	1	1	577207	423020
45VC	LockhartETAL(18)	Sediment sample from literature.	1	1	1	577207	423003
51PC	LockhartETAL(18)	Sediment sample from literature.	1	1	1	726479	511888
52PC	LockhartETAL(18)	Sediment sample from literature.	1	1	1	727660	514206
na	SomerfieldETAL(19)	Sediment sample from literature.	3	2	1	682467	435444
36VC	Scourse ETAL(19)	Sediment sample from literature.	4	3	1	530496	458593
38VC	Scourse ETAL(19)	Sediment sample from literature.	4	3	1	535947	453706
40VC	Scourse ETAL(19)	Sediment sample from literature.	6	5	3	543746	446567
42VC	Scourse ETAL(19)	Sediment sample from literature.	4	3	1	557399	434197
43VC	Scourse ETAL(19)	Sediment sample from literature.	4	3	1	566551	428328
45VC	Scourse ETAL(19)	Sediment sample from literature.	1	1	1	577207	423003
46VC	Scourse ETAL(19)	Sediment sample from literature.	3	2	1	586641	410102
47VC	Scourse ETAL(19)	Sediment sample from literature.	3	2	1	596408	403444
na2	LimETAL(17)	Seabed image from literature.	5	4	3	338155	526806
51-7/120/GS/1	BGS	Sediment sample from literature.	3	2	1	729709	555093
51-7/167/GS/1	BGS	Sediment sample from literature.	5	4	3	699516	509215
51-7/150/GS/1	BGS	Sediment sample from literature.	5	4	3	698642	530766
50-7/466/GS/1	BGS	Sediment sample from literature.	6	5	3	699934	473000
na3	Raes&Vanreusel(06)	Sediment sample from literature.	5	4	3	338155	524633
na4	HeindelETAL(10)	Seabed image from literature.	1	1	1	272923	610974
na5	RooijETAL(03)	Seismic interpretations from literature.	4	3	1	345449	645327
Hole 548	DelivetETAL(16)	Sediment sample from literature.	1	1	1	295773	248163
9G	HuvenneETAL(02)	Sediment sample from literature.	1	1	1	255991	618985
13G	HuvenneETAL(02)	Sediment sample from literature.	1	1	1	260583	630691
33G	HuvenneETAL(02)	Sediment sample from literature.	4	3	1	345340	511549
E0	EMO_est_25km	Estimate made from various data for this study.	6	5	3	484843	268945
E1	EMO_est_25km	Estimate made from various data for this study.	4	3	1	509843	268945
E2	EMO_est_25km	Estimate made from various data for this study.	4	3	1	534843	268945
E3	EMO_est_25km	Estimate made from various data for this study.	4	3	1	559843	268945
E4	EMO_est_25km	Estimate made from various data for this study.	4	3	1	584843	268945
E5	EMO_est_25km	Estimate made from various data for this study.	5	4	3	609843	268945
E6	EMO_est_25km	Estimate made from various data for this study.	4	3	1	384843	293945
E7	EMO_est_25km	Estimate made from various data for this study.	4	3	1	409843	293945
E8	EMO_est_25km	Estimate made from various data for this study.	3	2	1	434843	293945
E9	EMO_est_25km	Estimate made from various data for this study.	3	2	1	459843	293945
E10	EMO_est_25km	Estimate made from various data for this study.	3	2	1	484843	293945
E11	EMO_est_25km	Estimate made from various data for this study.	3	2	1	509843	293945
E12	EMO_est_25km	Estimate made from various data for this study.	3	2	1	534843	293945
E13	EMO_est_25km	Estimate made from various data for this study.	4	3	1	559843	293945
E14	EMO_est_25km	Estimate made from various data for this study.	4	3	1	584843	293945
E15	EMO_est_25km	Estimate made from various data for this study.	4	3	1	609843	293945
E16	EMO_est_25km	Estimate made from various data for this study.	4	3	1	384843	318945
E17	EMO_est_25km	Estimate made from various data for this study.	4	3	1	409843	318945
E18	EMO_est_25km	Estimate made from various data for this study.	3	2	1	434843	318945
E19	EMO_est_25km	Estimate made from various data for this study.	3	2	1	459843	318945
E20	EMO_est_25km	Estimate made from various data for this study.	4	3	1	484843	318945
E21	EMO_est_25km	Estimate made from various data for this study.	3	2	1	509843	318945
E22	EMO_est_25km	Estimate made from various data for this study.	3	2	1	559843	318945
E23	EMO_est_25km	Estimate made from various data for this study.	4	3	1	584843	318945
E24	EMO_est_25km	Estimate made from various data for this study.	4	3	1	609843	318945
E25	EMO_est_25km	Estimate made from various data for this study.	4	3	1	634843	318945
E26	EMO_est_25km	Estimate made from various data for this study.	4	3	1	659843	318945
E27	EMO_est_25km	Estimate made from various data for this study.	4	3	1	409843	343945
E28	EMO_est_25km	Estimate made from various data for this study.	3	2	1	434843	343945
E29	EMO_est_25km	Estimate made from various data for this study.	3	2	1	459843	343945
E30	EMO_est_25km	Estimate made from various data for this study.	1	1	1	484843	343945
E31	EMO_est_25km	Estimate made from various data for this study.	4	3	1	509843	343945
E32	EMO_est_25km	Estimate made from various data for this study.	4	3	1	534843	343945
E33	EMO_est_25km	Estimate made from various data for this study.	3	2	1	559843	343945
E34	EMO_est_25km	Estimate made from various data for this study.	3	2	1	584843	343945
E35	EMO_est_25km	Estimate made from various data for this study.	3	2	1	609843	343945
E36	EMO_est_25km	Estimate made from various data for this study.	3	2	1	634843	343945
E37	EMO_est_25km	Estimate made from various data for this study.	4	3	1	659843	343945
E38	EMO_est_25km	Estimate made from various data for this study.	4	3	1	684843	343945
E39	EMO_est_25km	Estimate made from various data for this study.	3	2	1	409843	368945
E40	EMO_est_25km	Estimate made from various data for this study.	3	2	1	434843	368945
E41	EMO_est_25km	Estimate made from various data for this study.	3	2	1	459843	368945
E42	EMO_est_25km	Estimate made from various data for this study.	4	3	1	484843	368945
E43	EMO_est_25km	Estimate made from various data for this study.	1	1	1	509843	368945
E44	EMO_est_25km	Estimate made from various data for this study.	1	1	1	534843	368945
E45	EMO_est_25km	Estimate made from various data for this study.	1	1	1	559843	368945
E46	EMO_est_25km	Estimate made from various data for this study.	3	2	1	584843	368945
E47	EMO_est_25km	Estimate made from various data for this study.	6	5	3	609843	368945
E48	EMO_est_25km	Estimate made from various data for this study.	3	2	1	634843	368945
E49	EMO_est_25km	Estimate made from various data for this study.	3	2	1	659843	368945
E50	EMO_est_25km	Estimate made from various data for this study.	6	5	3	684843	368945
E51	EMO_est_25km	Estimate made from various data for this study.	4	3	1	409843	393945
E52	EMO_est_25km	Estimate made from various data for this study.	3	2	1	434843	393945
E53	EMO_est_25km	Estimate made from various data for this study.	4	3	1	459843	393945
E54	EMO_est_25km	Estimate made from various data for this study.	4	3	1	484843	393945
E55	EMO_est_25km	Estimate made from various data for this study.	1	1	1	509843	393945
E56	EMO_est_25km	Estimate made from various data for this study.	1	1	1	534843	393945
E57	EMO_est_25km	Estimate made from various data for this study.	4	3	1	559843	393945
E58	EMO_est_25km	Estimate made from various data for this study.	3	2	1	609843	393945
E59	EMO_est_25km	Estimate made from various data for this study.	4	3	1	634843	393945
E60	EMO_est_25km	Estimate made from various data for this study.	3	2	1	659843	393945
E61	EMO_est_25km	Estimate made from various data for this study.	6	5	3	684843	393945
E62	EMO_est_25km	Estimate made from various data for this study.	4	3	1	409843	418945
E63	EMO_est_25km	Estimate made from various data for this study.	6	5	3	434843	418945
E64	EMO_est_25km	Estimate made from various data for this study.	4	3	1	459843	418945
E65	EMO_est_25km	Estimate made from various data for this study.	4	3	1	484843	418945
E66	EMO_est_25km	Estimate made from various data for this study.	3	2	1	509843	418945
E67	EMO_est_25km	Estimate made from various data for this study.	3	2	1	534843	418945
E68	EMO_est_25km	Estimate made from various data for this study.	1	1	1	559843	418945
E69	EMO_est_25km	Estimate made from various data for this study.	1	1	1	609843	418945
E70	EMO_est_25km	Estimate made from various data for this study.	4	3	1	634843	418945
E71	EMO_est_25km	Estimate made from various data for this study.	3	2	1	659843	418945
E72	EMO_est_25km	Estimate made from various data for this study.	4	3	1	684843	418945
E73	EMO_est_25km	Estimate made from various data for this study.	6	5	3	709843	418945
E74	EMO_est_25km	Estimate made from various data for this study.	2	1	1	384843	443945
E75	EMO_est_25km	Estimate made from various data for this study.	4	3	1	409843	443945
E76	EMO_est_25km	Estimate made from various data for this study.	4	3	1	434843	443945
E77	EMO_est_25km	Estimate made from various data for this study.	4	3	1	459843	443945
E78	EMO_est_25km	Estimate made from various data for this study.	4	3	1	484843	443945
E79	EMO_est_25km	Estimate made from various data for this study.	4	3	1	509843	443945
E80	EMO_est_25km	Estimate made from various data for this study.	1	1	1	559843	443945
E81	EMO_est_25km	Estimate made from various data for this study.	4	3	1	584843	443945
E82	EMO_est_25km	Estimate made from various data for this study.	1	1	1	609843	443945
E83	EMO_est_25km	Estimate made from various data for this study.	1	1	1	634843	443945
E84	EMO_est_25km	Estimate made from various data for this study.	5	4	3	659843	443945
E85	EMO_est_25km	Estimate made from various data for this study.	4	3	1	684843	443945
E86	EMO_est_25km	Estimate made from various data for this study.	4	3	1	709843	443945
E87	EMO_est_25km	Estimate made from various data for this study.	4	3	1	734843	443945
E88	EMO_est_25km	Estimate made from various data for this study.	5	4	3	359843	468945
E89	EMO_est_25km	Estimate made from various data for this study.	4	3	1	409843	468945
E90	EMO_est_25km	Estimate made from various data for this study.	4	3	1	434843	468945
E91	EMO_est_25km	Estimate made from various data for this study.	4	3	1	459843	468945
E92	EMO_est_25km	Estimate made from various data for this study.	5	4	3	484843	468945
E93	EMO_est_25km	Estimate made from various data for this study.	3	2	1	509843	468945
E94	EMO_est_25km	Estimate made from various data for this study.	5	4	3	534843	468945
E95	EMO_est_25km	Estimate made from various data for this study.	1	1	1	559843	468945
E96	EMO_est_25km	Estimate made from various data for this study.	4	3	1	584843	468945
E97	EMO_est_25km	Estimate made from various data for this study.	6	5	3	609843	468945
E98	EMO_est_25km	Estimate made from various data for this study.	4	3	1	634843	468945
E99	EMO_est_25km	Estimate made from various data for this study.	4	3	1	659843	468945
E100	EMO_est_25km	Estimate made from various data for this study.	5	4	3	684843	468945
E101	EMO_est_25km	Estimate made from various data for this study.	5	4	3	709843	468945
E102	EMO_est_25km	Estimate made from various data for this study.	3	2	1	734843	468945
E103	EMO_est_25km	Estimate made from various data for this study.	2	1	1	359843	493945
E104	EMO_est_25km	Estimate made from various data for this study.	4	3	1	409843	493945
E105	EMO_est_25km	Estimate made from various data for this study.	4	3	1	434843	493945
E106	EMO_est_25km	Estimate made from various data for this study.	4	3	1	459843	493945
E107	EMO_est_25km	Estimate made from various data for this study.	3	2	1	484843	493945
E108	EMO_est_25km	Estimate made from various data for this study.	3	2	1	509843	493945
E109	EMO_est_25km	Estimate made from various data for this study.	3	2	1	534843	493945
E110	EMO_est_25km	Estimate made from various data for this study.	1	1	1	559843	493945
E111	EMO_est_25km	Estimate made from various data for this study.	6	5	3	584843	493945
E112	EMO_est_25km	Estimate made from various data for this study.	6	5	3	609843	493945
E113	EMO_est_25km	Estimate made from various data for this study.	6	5	3	634843	493945
E114	EMO_est_25km	Estimate made from various data for this study.	3	2	1	659843	493945
E115	EMO_est_25km	Estimate made from various data for this study.	3	2	1	684843	493945
E116	EMO_est_25km	Estimate made from various data for this study.	2	1	1	709843	493945
E117	EMO_est_25km	Estimate made from various data for this study.	2	1	1	734843	493945
E118	EMO_est_25km	Estimate made from various data for this study.	4	3	1	759843	493945
E119	EMO_est_25km	Estimate made from various data for this study.	4	3	1	784843	493945
E120	EMO_est_25km	Estimate made from various data for this study.	5	4	3	584843	518945
E121	EMO_est_25km	Estimate made from various data for this study.	6	5	3	609843	518945
E122	EMO_est_25km	Estimate made from various data for this study.	6	5	3	634843	518945
E123	EMO_est_25km	Estimate made from various data for this study.	5	4	3	659843	518945
E124	EMO_est_25km	Estimate made from various data for this study.	3	2	1	684843	518945
E125	EMO_est_25km	Estimate made from various data for this study.	4	3	1	759843	518945
E126	EMO_est_25km	Estimate made from various data for this study.	4	3	1	784843	518945
E127	EMO_est_25km	Estimate made from various data for this study.	6	5	3	634843	543945
E128	EMO_est_25km	Estimate made from various data for this study.	5	4	3	659843	543945
E129	EMO_est_25km	Estimate made from various data for this study.	5	4	3	684843	543945
E130	EMO_est_25km	Estimate made from various data for this study.	3	2	1	709843	543945
E131	EMO_est_25km	Estimate made from various data for this study.	4	3	1	734843	543945
E132	EMO_est_25km	Estimate made from various data for this study.	5	4	3	759843	543945
E133	EMO_est_25km	Estimate made from various data for this study.	5	4	3	784843	543945
E134	EMO_est_25km	Estimate made from various data for this study.	2	1	1	359843	568945
E135	EMO_est_25km	Estimate made from various data for this study.	4	3	1	659843	568945
E136	EMO_est_25km	Estimate made from various data for this study.	3	2	1	684843	568945
E137	EMO_est_25km	Estimate made from various data for this study.	4	3	1	709843	568945
E138	EMO_est_25km	Estimate made from various data for this study.	6	5	3	759843	568945
E139	EMO_est_25km	Estimate made from various data for this study.	5	4	3	784843	568945
E140	EMO_est_25km	Estimate made from various data for this study.	2	1	1	334843	593945
E141	EMO_est_25km	Estimate made from various data for this study.	2	1	1	359843	593945
E142	EMO_est_25km	Estimate made from various data for this study.	7	5	5	659843	593945
E143	EMO_est_25km	Estimate made from various data for this study.	5	4	3	709843	593945
E144	EMO_est_25km	Estimate made from various data for this study.	6	5	3	734843	593945
E145	EMO_est_25km	Estimate made from various data for this study.	6	5	3	759843	593945
E146	EMO_est_25km	Estimate made from various data for this study.	6	5	3	809843	593945
E147	EMO_est_25km	Estimate made from various data for this study.	2	1	1	334843	618945
E148	EMO_est_25km	Estimate made from various data for this study.	6	5	3	759843	618945
E149	EMO_est_25km	Estimate made from various data for this study.	6	5	3	809843	618945
E150	EMO_est_25km	Estimate made from various data for this study.	2	1	1	309843	643945
E151	EMO_est_25km	Estimate made from various data for this study.	2	1	1	334843	643945
E152	EMO_est_25km	Estimate made from various data for this study.	5	4	3	734843	643945
E153	EMO_est_25km	Estimate made from various data for this study.	7	5	5	759843	643945
E154	EMO_est_25km	Estimate made from various data for this study.	6	5	3	784843	643945
E155	EMO_est_25km	Estimate made from various data for this study.	6	5	3	809843	643945
E156	EMO_est_25km	Estimate made from various data for this study.	2	1	1	309843	668945
E157	EMO_est_25km	Estimate made from various data for this study.	2	1	1	334843	668945
E158	EMO_est_25km	Estimate made from various data for this study.	5	4	3	459843	668945
E159	EMO_est_25km	Estimate made from various data for this study.	5	4	3	484843	668945
E160	EMO_est_25km	Estimate made from various data for this study.	7	5	5	759843	668945
E161	EMO_est_25km	Estimate made from various data for this study.	7	5	5	784843	668945
E162	EMO_est_25km	Estimate made from various data for this study.	6	5	3	809843	668945
E163	EMO_est_25km	Estimate made from various data for this study.	2	1	1	309843	693945
E164	EMO_est_25km	Estimate made from various data for this study.	2	1	1	334843	693945
E165	EMO_est_25km	Estimate made from various data for this study.	2	1	1	484843	693945
E166	EMO_est_25km	Estimate made from various data for this study.	6	5	3	784843	693945
E167	EMO_est_25km	Estimate made from various data for this study.	7	5	5	809843	693945
E168	EMO_est_25km	Estimate made from various data for this study.	2	1	1	309843	718945
E169	EMO_est_25km	Estimate made from various data for this study.	2	1	1	334843	718945
E170	EMO_est_25km	Estimate made from various data for this study.	3	2	1	509843	718945
E171	EMO_est_25km	Estimate made from various data for this study.	5	4	3	759843	718945
E172	EMO_est_25km	Estimate made from various data for this study.	6	5	3	784843	718945
E173	EMO_est_25km	Estimate made from various data for this study.	6	5	3	809843	718945
E174	EMO_est_25km	Estimate made from various data for this study.	2	1	1	309843	743945
E175	EMO_est_25km	Estimate made from various data for this study.	2	1	1	334843	743945
E176	EMO_est_25km	Estimate made from various data for this study.	6	5	3	809843	743945
E177	EMO_est_25km	Estimate made from various data for this study.	2	1	1	309843	768945
E178	EMO_est_25km	Estimate made from various data for this study.	2	1	1	334843	768945
E179	EMO_est_25km	Estimate made from various data for this study.	2	1	1	359843	768945
E180	EMO_est_25km	Estimate made from various data for this study.	4	3	1	784843	768945
E181	EMO_est_25km	Estimate made from various data for this study.	5	4	3	809843	768945
E182	EMO_est_25km	Estimate made from various data for this study.	2	1	1	309843	793945
E183	EMO_est_25km	Estimate made from various data for this study.	2	1	1	334843	793945
E184	EMO_est_25km	Estimate made from various data for this study.	2	1	1	359843	793945
E185	EMO_est_25km	Estimate made from various data for this study.	2	1	1	384843	793945
E186	EMO_est_25km	Estimate made from various data for this study.	1	1	1	759843	793945
E187	EMO_est_25km	Estimate made from various data for this study.	2	1	1	784843	793945
E188	EMO_est_25km	Estimate made from various data for this study.	6	5	3	809843	793945
E189	EMO_est_25km	Estimate made from various data for this study.	2	1	1	334843	818945
E190	EMO_est_25km	Estimate made from various data for this study.	2	1	1	359843	818945
E191	EMO_est_25km	Estimate made from various data for this study.	2	1	1	409843	818945
E192	EMO_est_25km	Estimate made from various data for this study.	2	1	1	759843	818945
E193	EMO_est_25km	Estimate made from various data for this study.	1	1	1	784843	818945
E194	EMO_est_25km	Estimate made from various data for this study.	6	5	3	809843	818945
E195	EMO_est_25km	Estimate made from various data for this study.	2	1	1	334843	843945
E196	EMO_est_25km	Estimate made from various data for this study.	2	1	1	359843	843945
E197	EMO_est_25km	Estimate made from various data for this study.	2	1	1	384843	843945
E198	EMO_est_25km	Estimate made from various data for this study.	2	1	1	409843	843945
E199	EMO_est_25km	Estimate made from various data for this study.	1	1	1	784843	843945
E200	EMO_est_25km	Estimate made from various data for this study.	4	3	1	809843	843945
E201	EMO_est_25km	Estimate made from various data for this study.	2	1	1	334843	868945
E202	EMO_est_25km	Estimate made from various data for this study.	2	1	1	359843	868945
E203	EMO_est_25km	Estimate made from various data for this study.	2	1	1	384843	868945
E204	EMO_est_25km	Estimate made from various data for this study.	2	1	1	409843	868945
E205	EMO_est_25km	Estimate made from various data for this study.	2	1	1	434843	868945
E206	EMO_est_25km	Estimate made from various data for this study.	2	1	1	359843	893945
E207	EMO_est_25km	Estimate made from various data for this study.	2	1	1	409843	893945
E208	EMO_est_25km	Estimate made from various data for this study.	2	1	1	434843	893945
E209	EMO_est_25km	Estimate made from various data for this study.	7	5	5	534843	893945
E210	EMO_est_25km	Estimate made from various data for this study.	2	1	1	384843	918945
E211	EMO_est_25km	Estimate made from various data for this study.	2	1	1	409843	918945
E212	EMO_est_25km	Estimate made from various data for this study.	3	2	1	434843	918945
E213	EMO_est_25km	Estimate made from various data for this study.	3	2	1	384843	943945
E214	EMO_est_25km	Estimate made from various data for this study.	3	2	1	409843	943945
E215	EMO_est_25km	Estimate made from various data for this study.	3	2	1	434843	943945
E216	EMO_est_25km	Estimate made from various data for this study.	3	2	1	459843	943945
E217	EMO_est_25km	Estimate made from various data for this study.	4	3	1	684843	943945
E218	EMO_est_25km	Estimate made from various data for this study.	6	5	3	709843	943945
E219	EMO_est_25km	Estimate made from various data for this study.	5	4	3	734843	943945
E220	EMO_est_25km	Estimate made from various data for this study.	3	2	1	384843	968945
E221	EMO_est_25km	Estimate made from various data for this study.	3	2	1	409843	968945
E222	EMO_est_25km	Estimate made from various data for this study.	3	2	1	434843	968945
E223	EMO_est_25km	Estimate made from various data for this study.	3	2	1	459843	968945
E224	EMO_est_25km	Estimate made from various data for this study.	3	2	1	484843	968945
E225	EMO_est_25km	Estimate made from various data for this study.	6	5	3	534843	968945
E226	EMO_est_25km	Estimate made from various data for this study.	6	5	3	709843	968945
E227	EMO_est_25km	Estimate made from various data for this study.	6	5	3	734843	968945
E228	EMO_est_25km	Estimate made from various data for this study.	3	2	1	409843	993945
E229	EMO_est_25km	Estimate made from various data for this study.	3	2	1	434843	993945
E230	EMO_est_25km	Estimate made from various data for this study.	3	2	1	459843	993945
E231	EMO_est_25km	Estimate made from various data for this study.	3	2	1	484843	993945
E232	EMO_est_25km	Estimate made from various data for this study.	6	5	3	559843	993945
E233	EMO_est_25km	Estimate made from various data for this study.	6	5	3	684843	993945
E234	EMO_est_25km	Estimate made from various data for this study.	1	1	1	734843	993945
E235	EMO_est_25km	Estimate made from various data for this study.	3	2	1	434843	1.01894e+06
E236	EMO_est_25km	Estimate made from various data for this study.	3	2	1	459843	1.01894e+06
E237	EMO_est_25km	Estimate made from various data for this study.	3	2	1	484843	1.01894e+06
E238	EMO_est_25km	Estimate made from various data for this study.	3	2	1	509843	1.01894e+06
E239	EMO_est_25km	Estimate made from various data for this study.	4	3	1	609843	1.01894e+06
E240	EMO_est_25km	Estimate made from various data for this study.	4	3	1	659843	1.01894e+06
E241	EMO_est_25km	Estimate made from various data for this study.	4	3	1	684843	1.01894e+06
E242	EMO_est_25km	Estimate made from various data for this study.	4	3	1	709843	1.01894e+06
E243	EMO_est_25km	Estimate made from various data for this study.	5	4	3	734843	1.01894e+06
E244	EMO_est_25km	Estimate made from various data for this study.	3	2	1	434843	1.04394e+06
E245	EMO_est_25km	Estimate made from various data for this study.	3	2	1	459843	1.04394e+06
E246	EMO_est_25km	Estimate made from various data for this study.	3	2	1	484843	1.04394e+06
E247	EMO_est_25km	Estimate made from various data for this study.	3	2	1	509843	1.04394e+06
E248	EMO_est_25km	Estimate made from various data for this study.	6	5	3	534843	1.04394e+06
E249	EMO_est_25km	Estimate made from various data for this study.	6	5	3	559843	1.04394e+06
E250	EMO_est_25km	Estimate made from various data for this study.	6	5	3	584843	1.04394e+06
E251	EMO_est_25km	Estimate made from various data for this study.	6	5	3	609843	1.04394e+06
E252	EMO_est_25km	Estimate made from various data for this study.	4	3	1	634843	1.04394e+06
E253	EMO_est_25km	Estimate made from various data for this study.	4	3	1	659843	1.04394e+06
E254	EMO_est_25km	Estimate made from various data for this study.	4	3	1	684843	1.04394e+06
E255	EMO_est_25km	Estimate made from various data for this study.	4	3	1	709843	1.04394e+06
E256	EMO_est_25km	Estimate made from various data for this study.	5	4	3	459843	1.06894e+06
E257	EMO_est_25km	Estimate made from various data for this study.	2	1	1	484843	1.06894e+06
E258	EMO_est_25km	Estimate made from various data for this study.	3	2	1	509843	1.06894e+06
E259	EMO_est_25km	Estimate made from various data for this study.	6	5	3	534843	1.06894e+06
E260	EMO_est_25km	Estimate made from various data for this study.	6	5	3	559843	1.06894e+06
E261	EMO_est_25km	Estimate made from various data for this study.	4	3	1	584843	1.06894e+06
E262	EMO_est_25km	Estimate made from various data for this study.	4	3	1	609843	1.06894e+06
E263	EMO_est_25km	Estimate made from various data for this study.	4	3	1	634843	1.06894e+06
E264	EMO_est_25km	Estimate made from various data for this study.	6	5	3	659843	1.06894e+06
E265	EMO_est_25km	Estimate made from various data for this study.	6	5	3	684843	1.06894e+06
E266	EMO_est_25km	Estimate made from various data for this study.	1	1	1	484843	1.09394e+06
E267	EMO_est_25km	Estimate made from various data for this study.	1	1	1	509843	1.09394e+06
E268	EMO_est_25km	Estimate made from various data for this study.	3	2	1	534843	1.09394e+06
E269	EMO_est_25km	Estimate made from various data for this study.	6	5	3	559843	1.09394e+06
E270	EMO_est_25km	Estimate made from various data for this study.	3	2	1	584843	1.09394e+06
E271	EMO_est_25km	Estimate made from various data for this study.	6	5	3	609843	1.09394e+06
E272	EMO_est_25km	Estimate made from various data for this study.	3	2	1	634843	1.09394e+06
E273	EMO_est_25km	Estimate made from various data for this study.	6	5	3	659843	1.09394e+06
E274	EMO_est_25km	Estimate made from various data for this study.	1	1	1	509843	1.11894e+06
E275	EMO_est_25km	Estimate made from various data for this study.	4	3	1	534843	1.11894e+06
E276	EMO_est_25km	Estimate made from various data for this study.	6	5	3	559843	1.11894e+06
E277	EMO_est_25km	Estimate made from various data for this study.	4	3	1	584843	1.11894e+06
